# Supplementary figures and images for: Rapid Inactivation of SARS-CoV-2 Variants by Continuous and Intermittent Irradiation with a Deep-Ultraviolet Light-Emitting Diode (DUV-LED) Device
Source: MDPI journal article supplement (doi:10.3390/pathogens10060754), 2021-06-15

Scheme 1

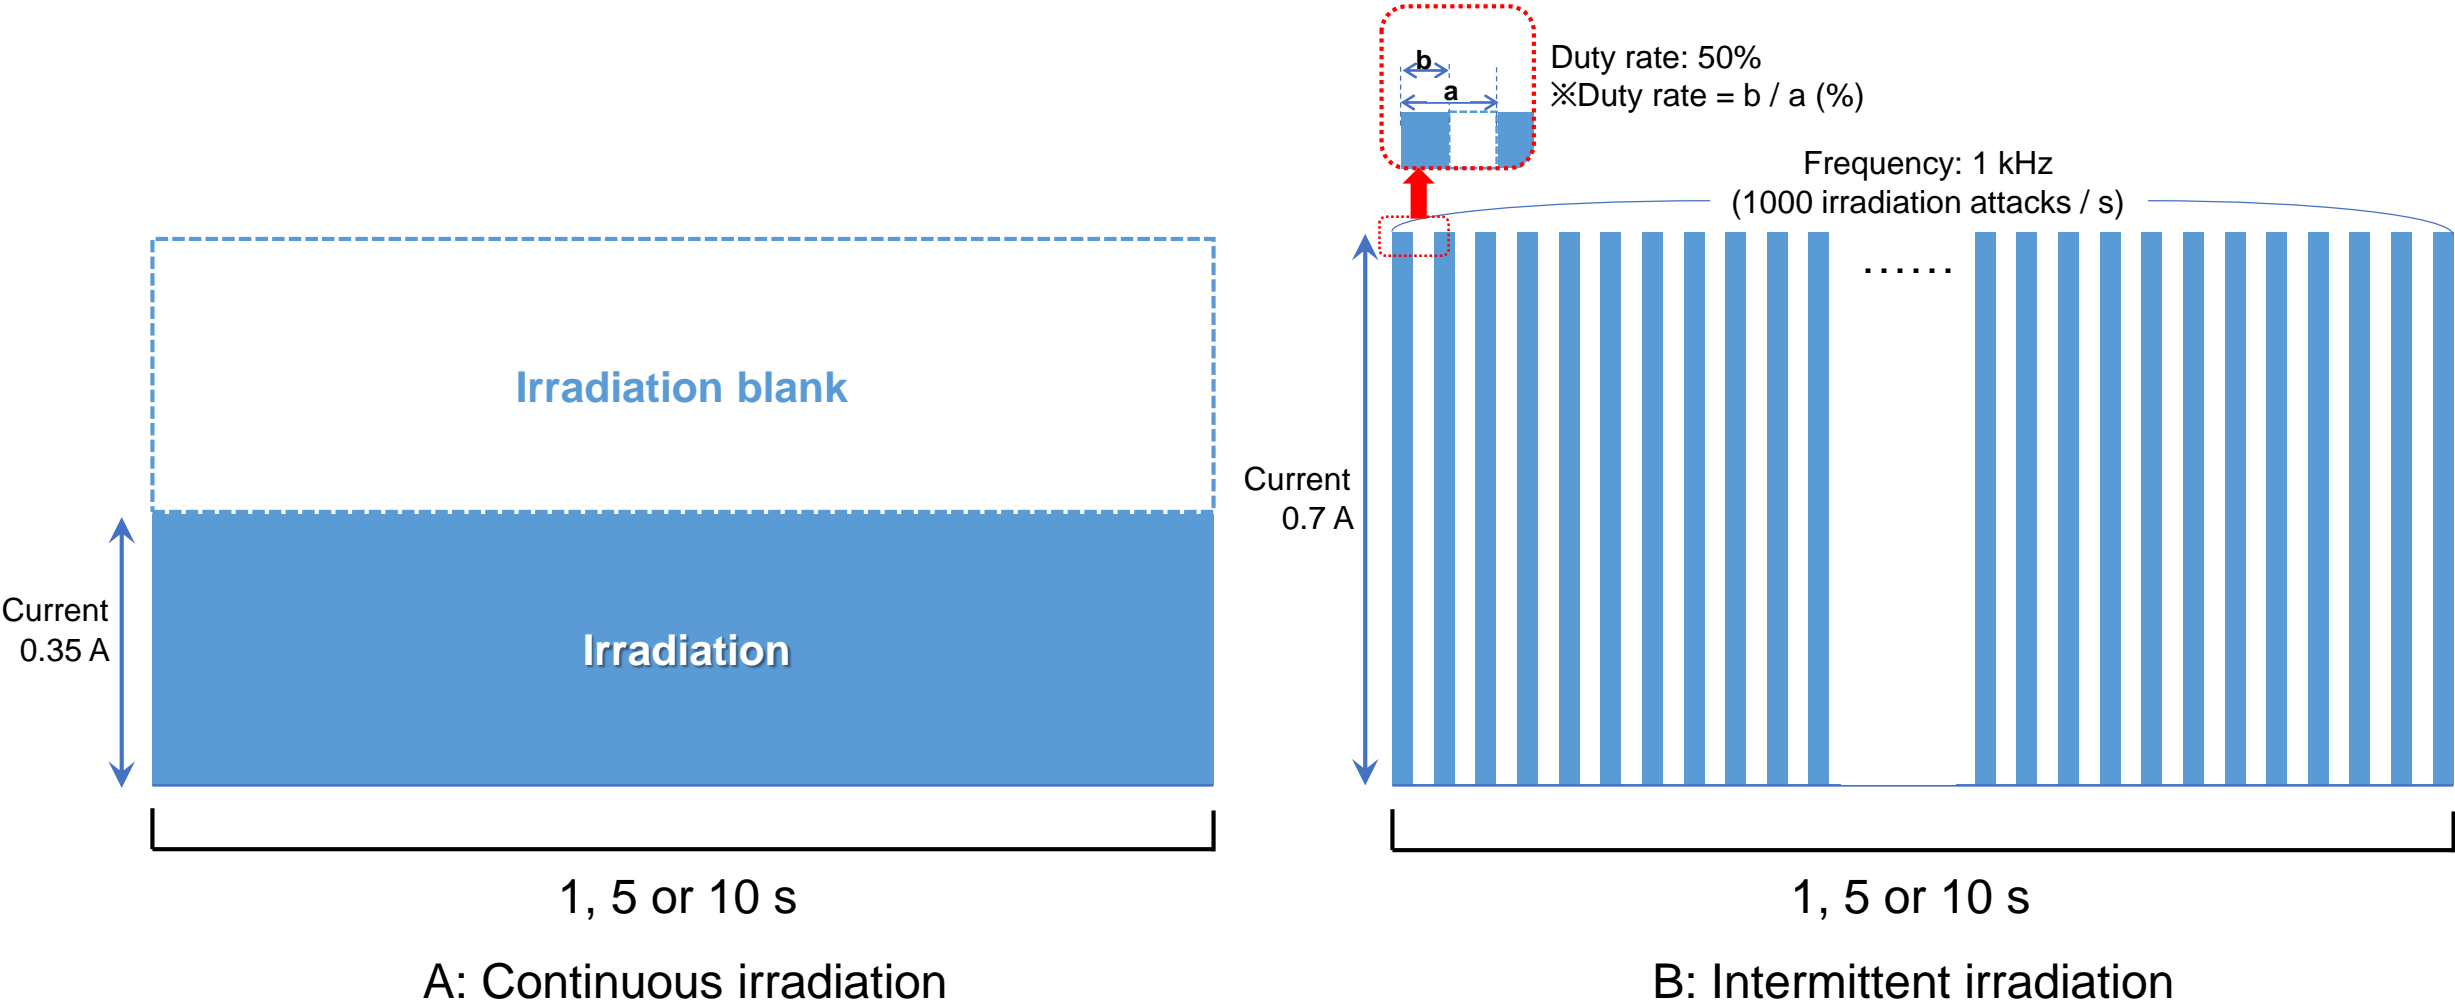

Supplement: s1 [file s1]
